# Supplementary material
Source: MDPI journal article supplement (https://www.mdpi.com/2227-7080/12/3/31)
Supplement: s1 [file s1]

**Table S2.** Articles by combinations of techniques for spatial-temporal representation with main uses for each paper, encoded through the size of the circles. This size indicates whether more or fewer papers from each group performed the respective target use.

| Papers                                                                   | Bar chart | Line chart | Pie chart | Map | Color-coded | Line heatmap | Animation | Filter of time | Timeline | Area chart | Real-time graphs | Others | Real-time presentation                                                                | Real-time Detection                                                                   | Post-analysis                                                                         | Trend prediction and estimation                                                       |
|--------------------------------------------------------------------------|-----------|------------|-----------|-----|-------------|--------------|-----------|----------------|----------|------------|------------------|--------|---------------------------------------------------------------------------------------|---------------------------------------------------------------------------------------|---------------------------------------------------------------------------------------|---------------------------------------------------------------------------------------|
| [23,28,57,86,95,97,99,100,103,108,126]                                   |           | X          |           |     |             |              |           |                |          |            |                  |        |    |    |    |    |
| [14,19,37,49,50,55,62,64,71,76,84,90,92,94,120,124]<br>[106]<br>[31,107] | X         | X          | X         | X   | X           |              |           |                |          |            |                  |        |    |                                                                                       |    |    |
| [27,118]<br>[25,65,121]                                                  |           | X          |           | X   |             | X            |           | X              |          |            |                  |        |                                                                                       |  |  |  |
| [109]                                                                    | X         | X          |           | X   |             |              |           | X              |          |            |                  |        |  |  |  |                                                                                       |
| [79,105,116,119]<br>[61,89,115,117]<br>[114]                             |           |            |           | X   |             |              |           | X              |          |            |                  |        |                                                                                       |  |                                                                                       |  |
|                                                                          |           |            |           | X   |             | X            | X         | X              |          |            | X                |        |                                                                                       |                                                                                       |                                                                                       |                                                                                       |

[illegible]
