# Supplementary material
Source: MDPI journal article supplement (https://www.mdpi.com/2227-7080/12/3/31)
Supplement: s1 [file s1]

Archive with 2 entries (2 files):
- technologies-2841237-supplementary Table S1.pdf
- technologies-2841237-supplementary Table S2.pdf
